# Supplementary material
Source: publisher figshare collection journal article supplement (https://acs.figshare.com/ndownloader/files/31325280)
Supplement: Supplementary file 1 [file 31325280]

## Supporting Information

### Heterocyclic Diamines with Leishmanicidal Activity

Álvaro Martín-Montes<sup>1</sup>, María Paz Clares<sup>2</sup>, Rubén Martín-Escolano<sup>1,3</sup>, Estefanía Delgado-Pinar,<sup>2,4</sup> Clotilde Marín<sup>1</sup>, Begoña Verdejo,<sup>2</sup> Álvaro Martínez-Camarena,<sup>2</sup> Daniel Molina-Carreño<sup>1</sup>, Enrique García-España<sup>2</sup>, Manuel Sánchez-Moreno<sup>1</sup>

1. Departamento de Parasitología, Facultad de ciencias, Universidad de Granada, C/ Severo Ochoa s/n, 18071, Granada, España.

2. Instituto de Ciencia Molecular Universidad De Valencia, C/ Catedrático José Beltrán 2, 46980 Paterna (Valencia), Spain.

3. Laboratory of Molecular & Evolutionary Parasitology, RAPID group, School of Biosciences, University of Kent, CT2 7NJ, Canterbury, UK.

4. University of Coimbra, Department of chemistry, CQC, P3004-535, Coimbra, Portugal.

## Table of contents

**Figure S1.** Distribution diagrams of the systems **1-H<sup>+</sup>**, **3-H<sup>+</sup>**, **4-H<sup>+</sup>**, **6-H<sup>+</sup>**, **7-H<sup>+</sup>**, **9-H<sup>+</sup>** and **10-H<sup>+</sup>**

**Figure S2.** Detail of the interaction of a methylated (**8**) and a non-methylated system (**10**) with the active centre of Fe-SOD. The increase in the number of hydrogen bonds that can be established and the reduction of the steric hindrances generated by the non-methylated system increases the effectiveness of the interaction of the ligand with the residue Gln71, leading to a higher distortion of the active centre.

**Figure S3.** Detail of the interaction of a quinoline (**10**) and a pyridine system (**1**) with the active centre of Fe-SOD. The increase of the surface area of the aromatic moiety favours the interaction with residue Tyr75 through  $\pi$ -stacking, thus increasing the affinity between both systems.

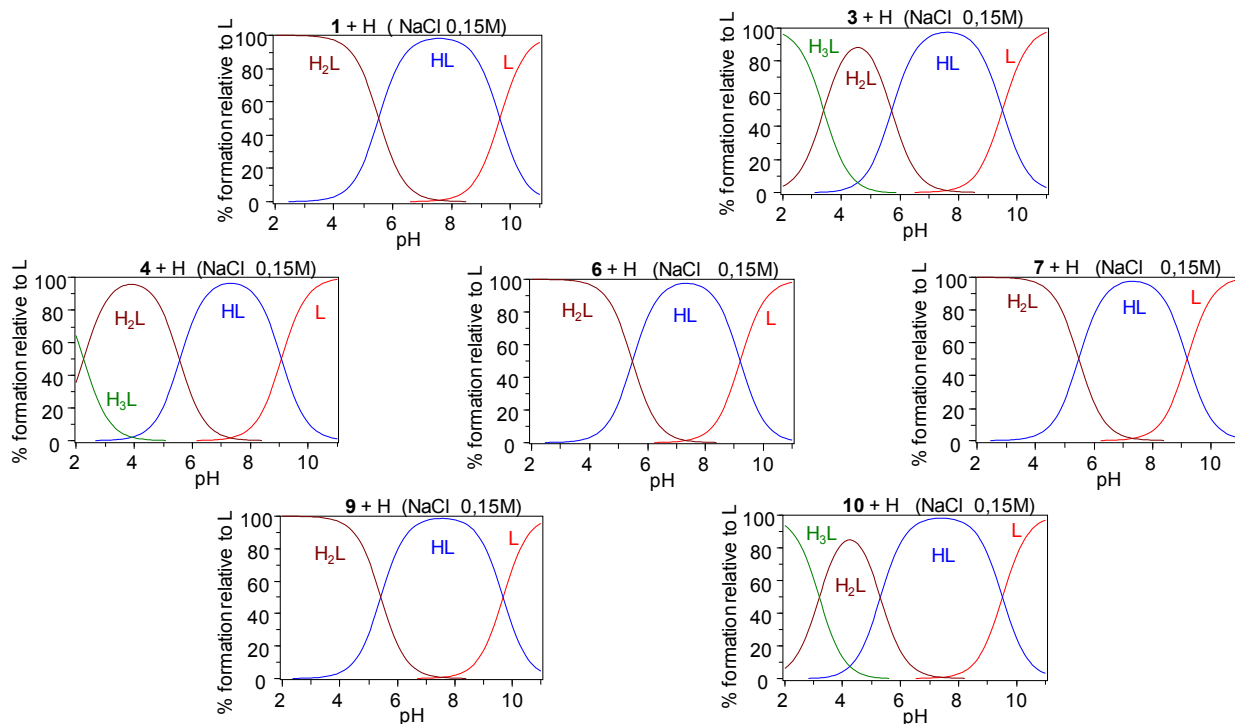

**Figure S1.** Distribution diagrams of the systems  $1\text{-H}^+$ ,  $3\text{-H}^+$ ,  $4\text{-H}^+$ ,  $6\text{-H}^+$ ,  $7\text{-H}^+$ ,  $9\text{-H}^+$  and  $10\text{-H}^+$

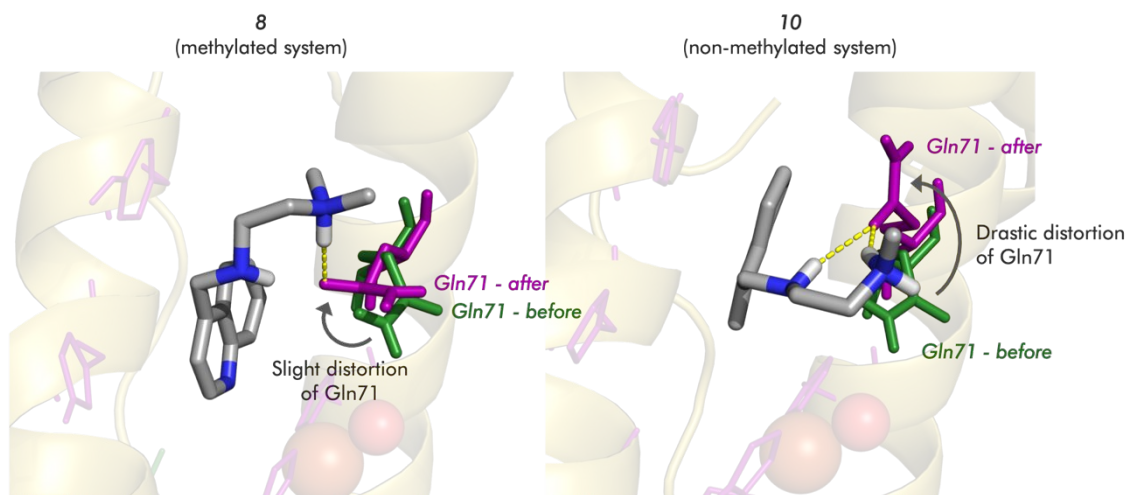

**Figure S2.** Detail of the interaction of a methylated (**8**) and a non-methylated system (**10**) with the active centre of Fe-SOD. The increase in the number of hydrogen bonds that can be established and the reduction of the steric hindrances generated by the non-methylated system increases the effectiveness of the interaction of the ligand with the residue Gln71, leading to a higher distortion of the active centre.

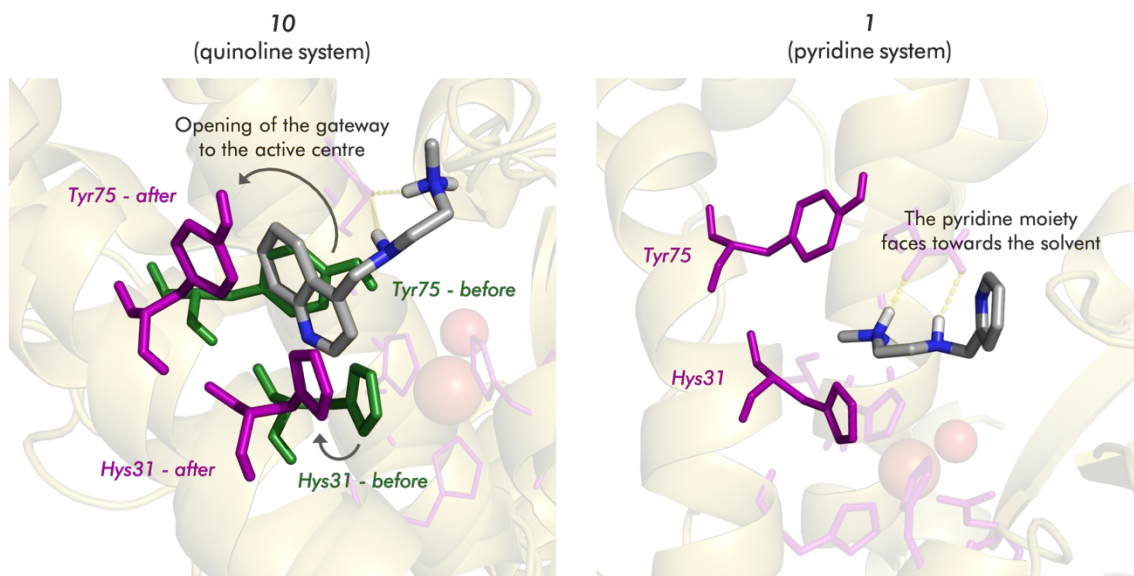

**Figure S3.** Detail of the interaction of a quinoline (**10**) and a pyridine system (**1**) with the active centre of Fe-SOD. The increase of the surface area of the aromatic moiety favours the interaction with residue Tyr75 through  $\pi$ -stacking, thus increasing the affinity between both systems.
